# Supplementary material for: An allosteric transport mechanism for the AcrAB-TolC multidrug efflux pump
Source: eLife journal article supplement (doi:10.7554/elife.24905), 2017-03-29
Supplement: supp [file elife_poa_e24905_Figure_1_Supplement_1.docx]

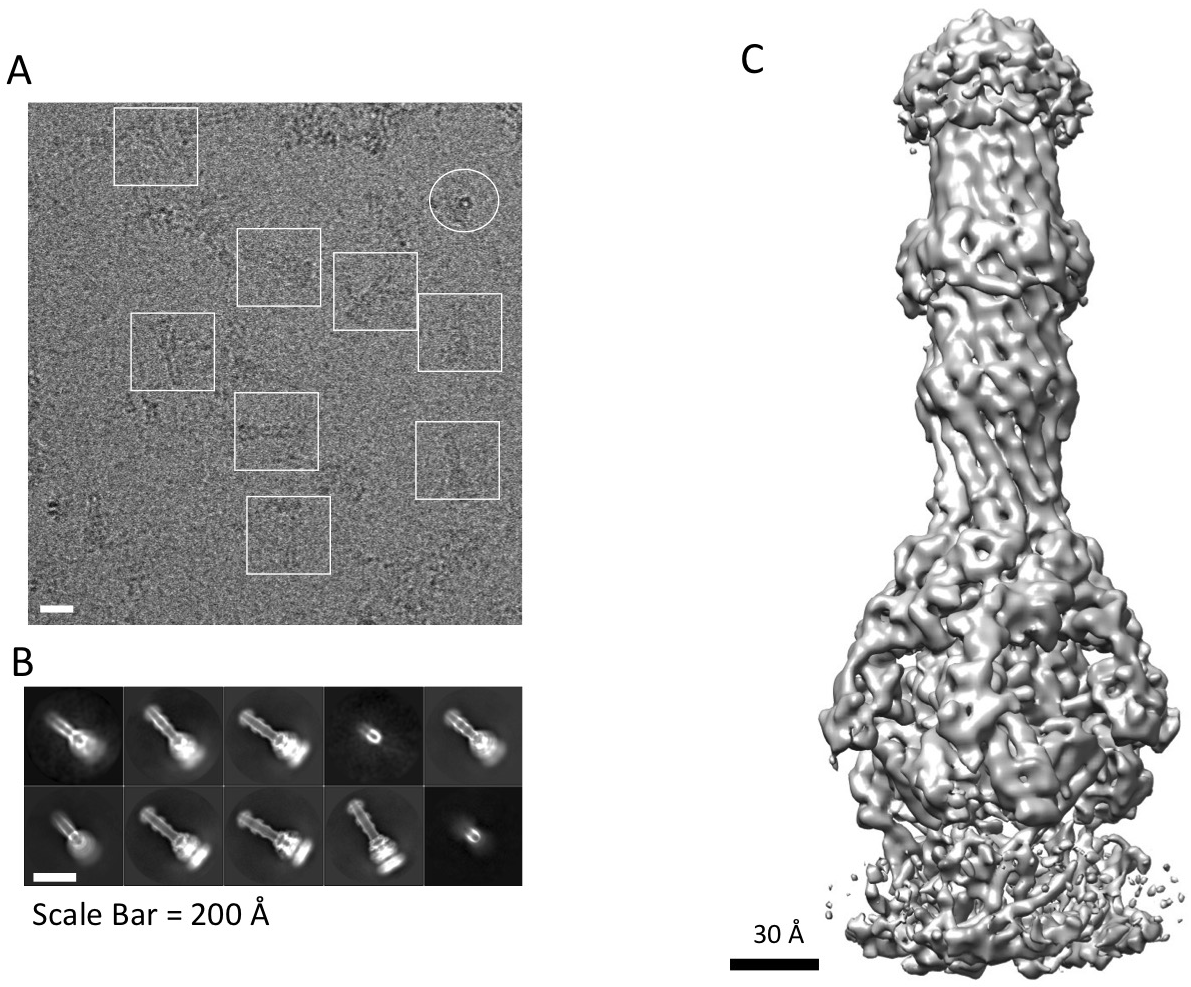


**Figure 1 – supplement 1. CryoEM structure of the AcrABZ-TolC pump with MBX3132 bound.**  (A) A representative motion-corrected cryoEM image of ice-embedded AcrABZ-TolC/MBX3132 recorded using the K2 Summit camera. (B) Gallery of reference free 2D averages from the images (prepared by Relion1.4). (C) 3.6 Å resolution density map reconstructed in C1 symmetry with the full image data set.
