# Supplementary material for: An allosteric transport mechanism for the AcrAB-TolC multidrug efflux pump
Source: eLife journal article supplement (doi:10.7554/elife.24905), 2017-03-29
Supplement: supp [file elife_poa_e24905_Figure_1_Supplement_2.docx]

**
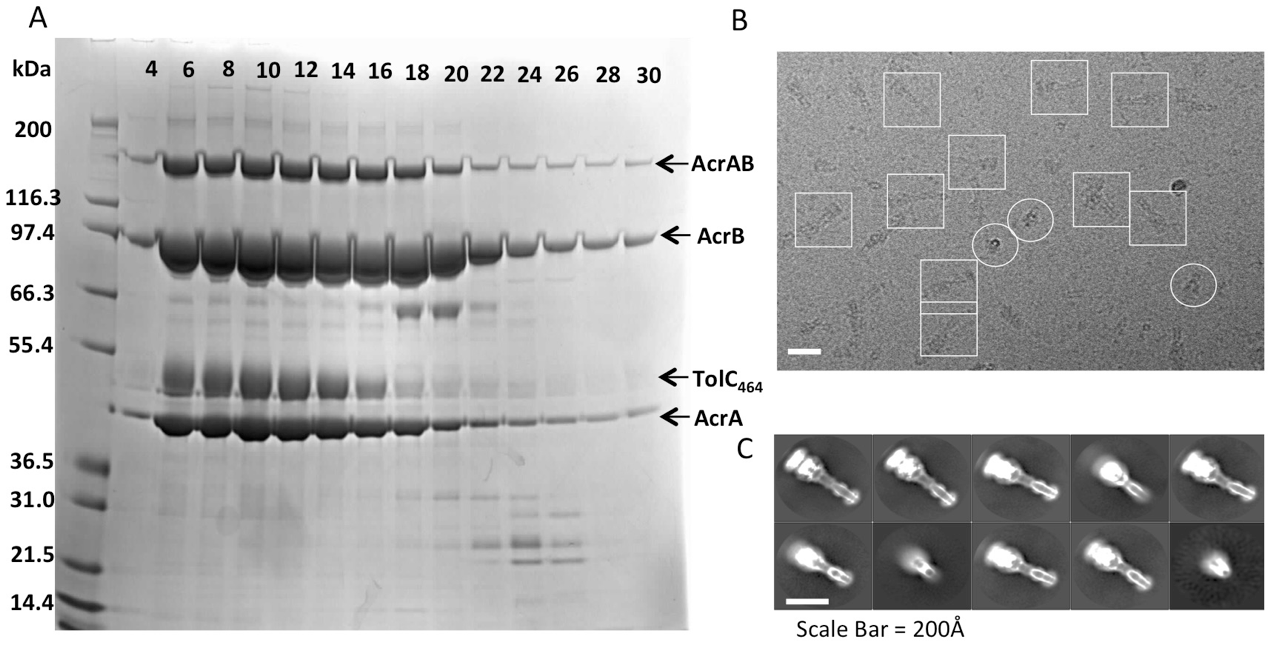
**

**Figure 1 – supplement 2. Analysis of the disulfide-bond stabilized AcrAB-TolC pump.** (A) Single cysteine-substitutions in the AcrA and AcrB components (AcrA-S273C and AcrB-S258C) generate stable covalent complexes of AcrAB. The lanes show SDS-PAGE assay of fractions from size exclusion chromatography elution of the double cysteine mutant in the presence of reducing agent. The identity of the bands is indicated. The AcrAB cysteine mutant co-elutes with co-expressed truncated TolC464, indicating that the proteins have formed a stable assembly.(B) A representative motion-corrected cryo-EM image of ice-embedded AcrAB-TolC pump recorded using the K2 Summit camera. (C)Reference free 2D averages by Relion 2.0.
