# Supplementary material for: An allosteric transport mechanism for the AcrAB-TolC multidrug efflux pump
Source: eLife journal article supplement (doi:10.7554/elife.24905), 2017-03-29
Supplement: supp [file elife_poa_e24905_Figure_1_Supplement_3.docx]

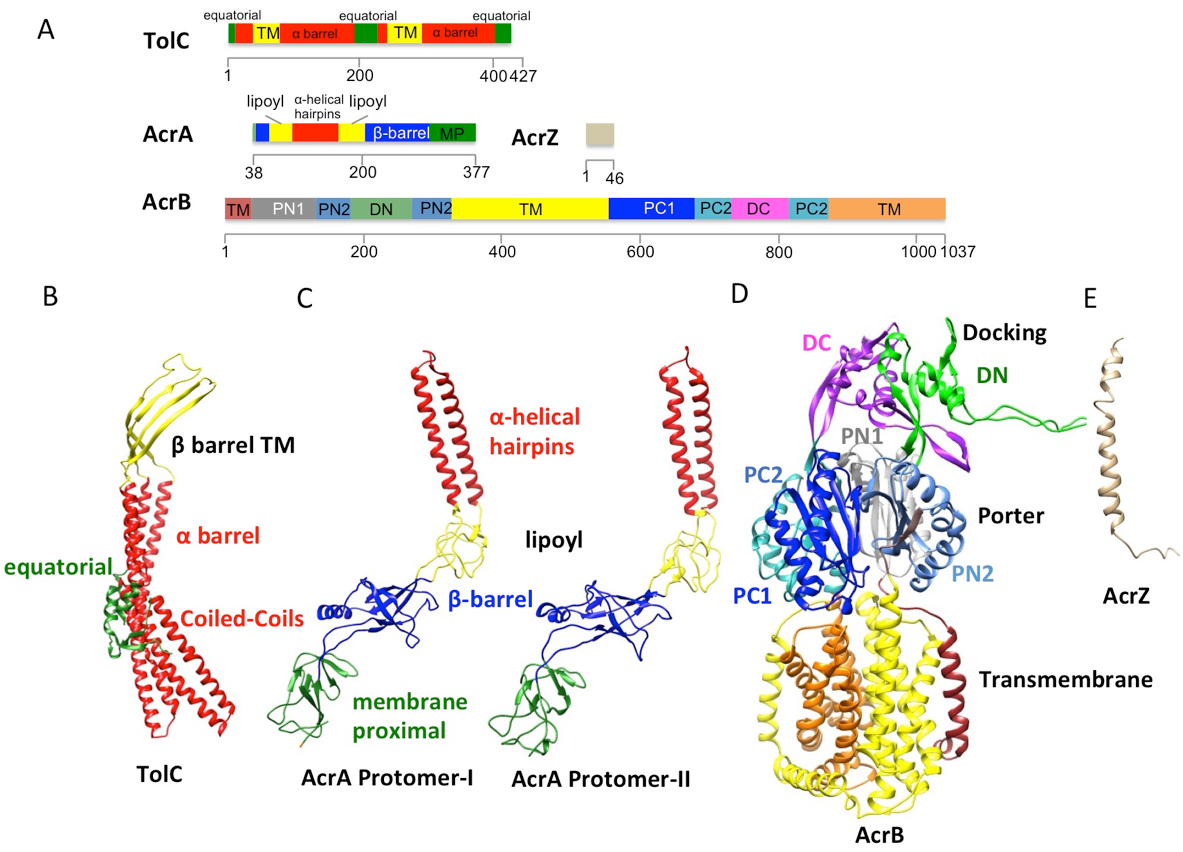


**Figure 1 – supplement 3. The domains and subdomains of the components of AcrABZ-TolC pump.** (A) Linear representation of protein components of AcrABZ-TolC. The domains are described in the text. The cryoEM derived models of fitted subunits of TolC (B), AcrA (C) AcrB (D) and AcrZ (E) are colour-coded by domains as in panel (A).
