# Supplementary material for: An allosteric transport mechanism for the AcrAB-TolC multidrug efflux pump
Source: eLife journal article supplement (doi:10.7554/elife.24905), 2017-03-29
Supplement: supp [file elife_poa_e24905_Figure_1_Supplement_4.docx]

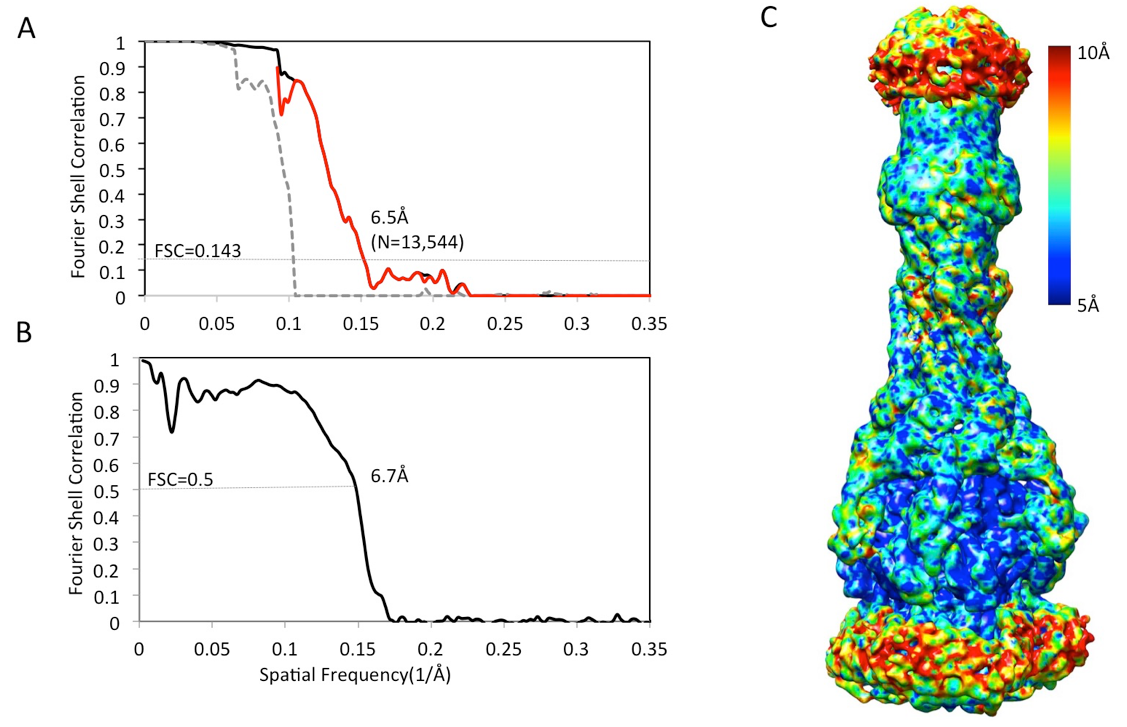


**Figure 1 – supplement 4. Resolution estimation of the apo AcrAB-TolC pump with closed TolC.** (A)True FSC curves of AcrAB-TolC pump with closed TolC. (B)FSC between cryoEM density map and model. (C)Coloured coded ResMap map of the apo AcrAB-TolC. The map is depicted as viewed along the membrane plane.
