# Supplementary material for: An allosteric transport mechanism for the AcrAB-TolC multidrug efflux pump
Source: eLife journal article supplement (doi:10.7554/elife.24905), 2017-03-29
Supplement: supp [file elife_poa_e24905_Figure_1_Supplement_5.docx]

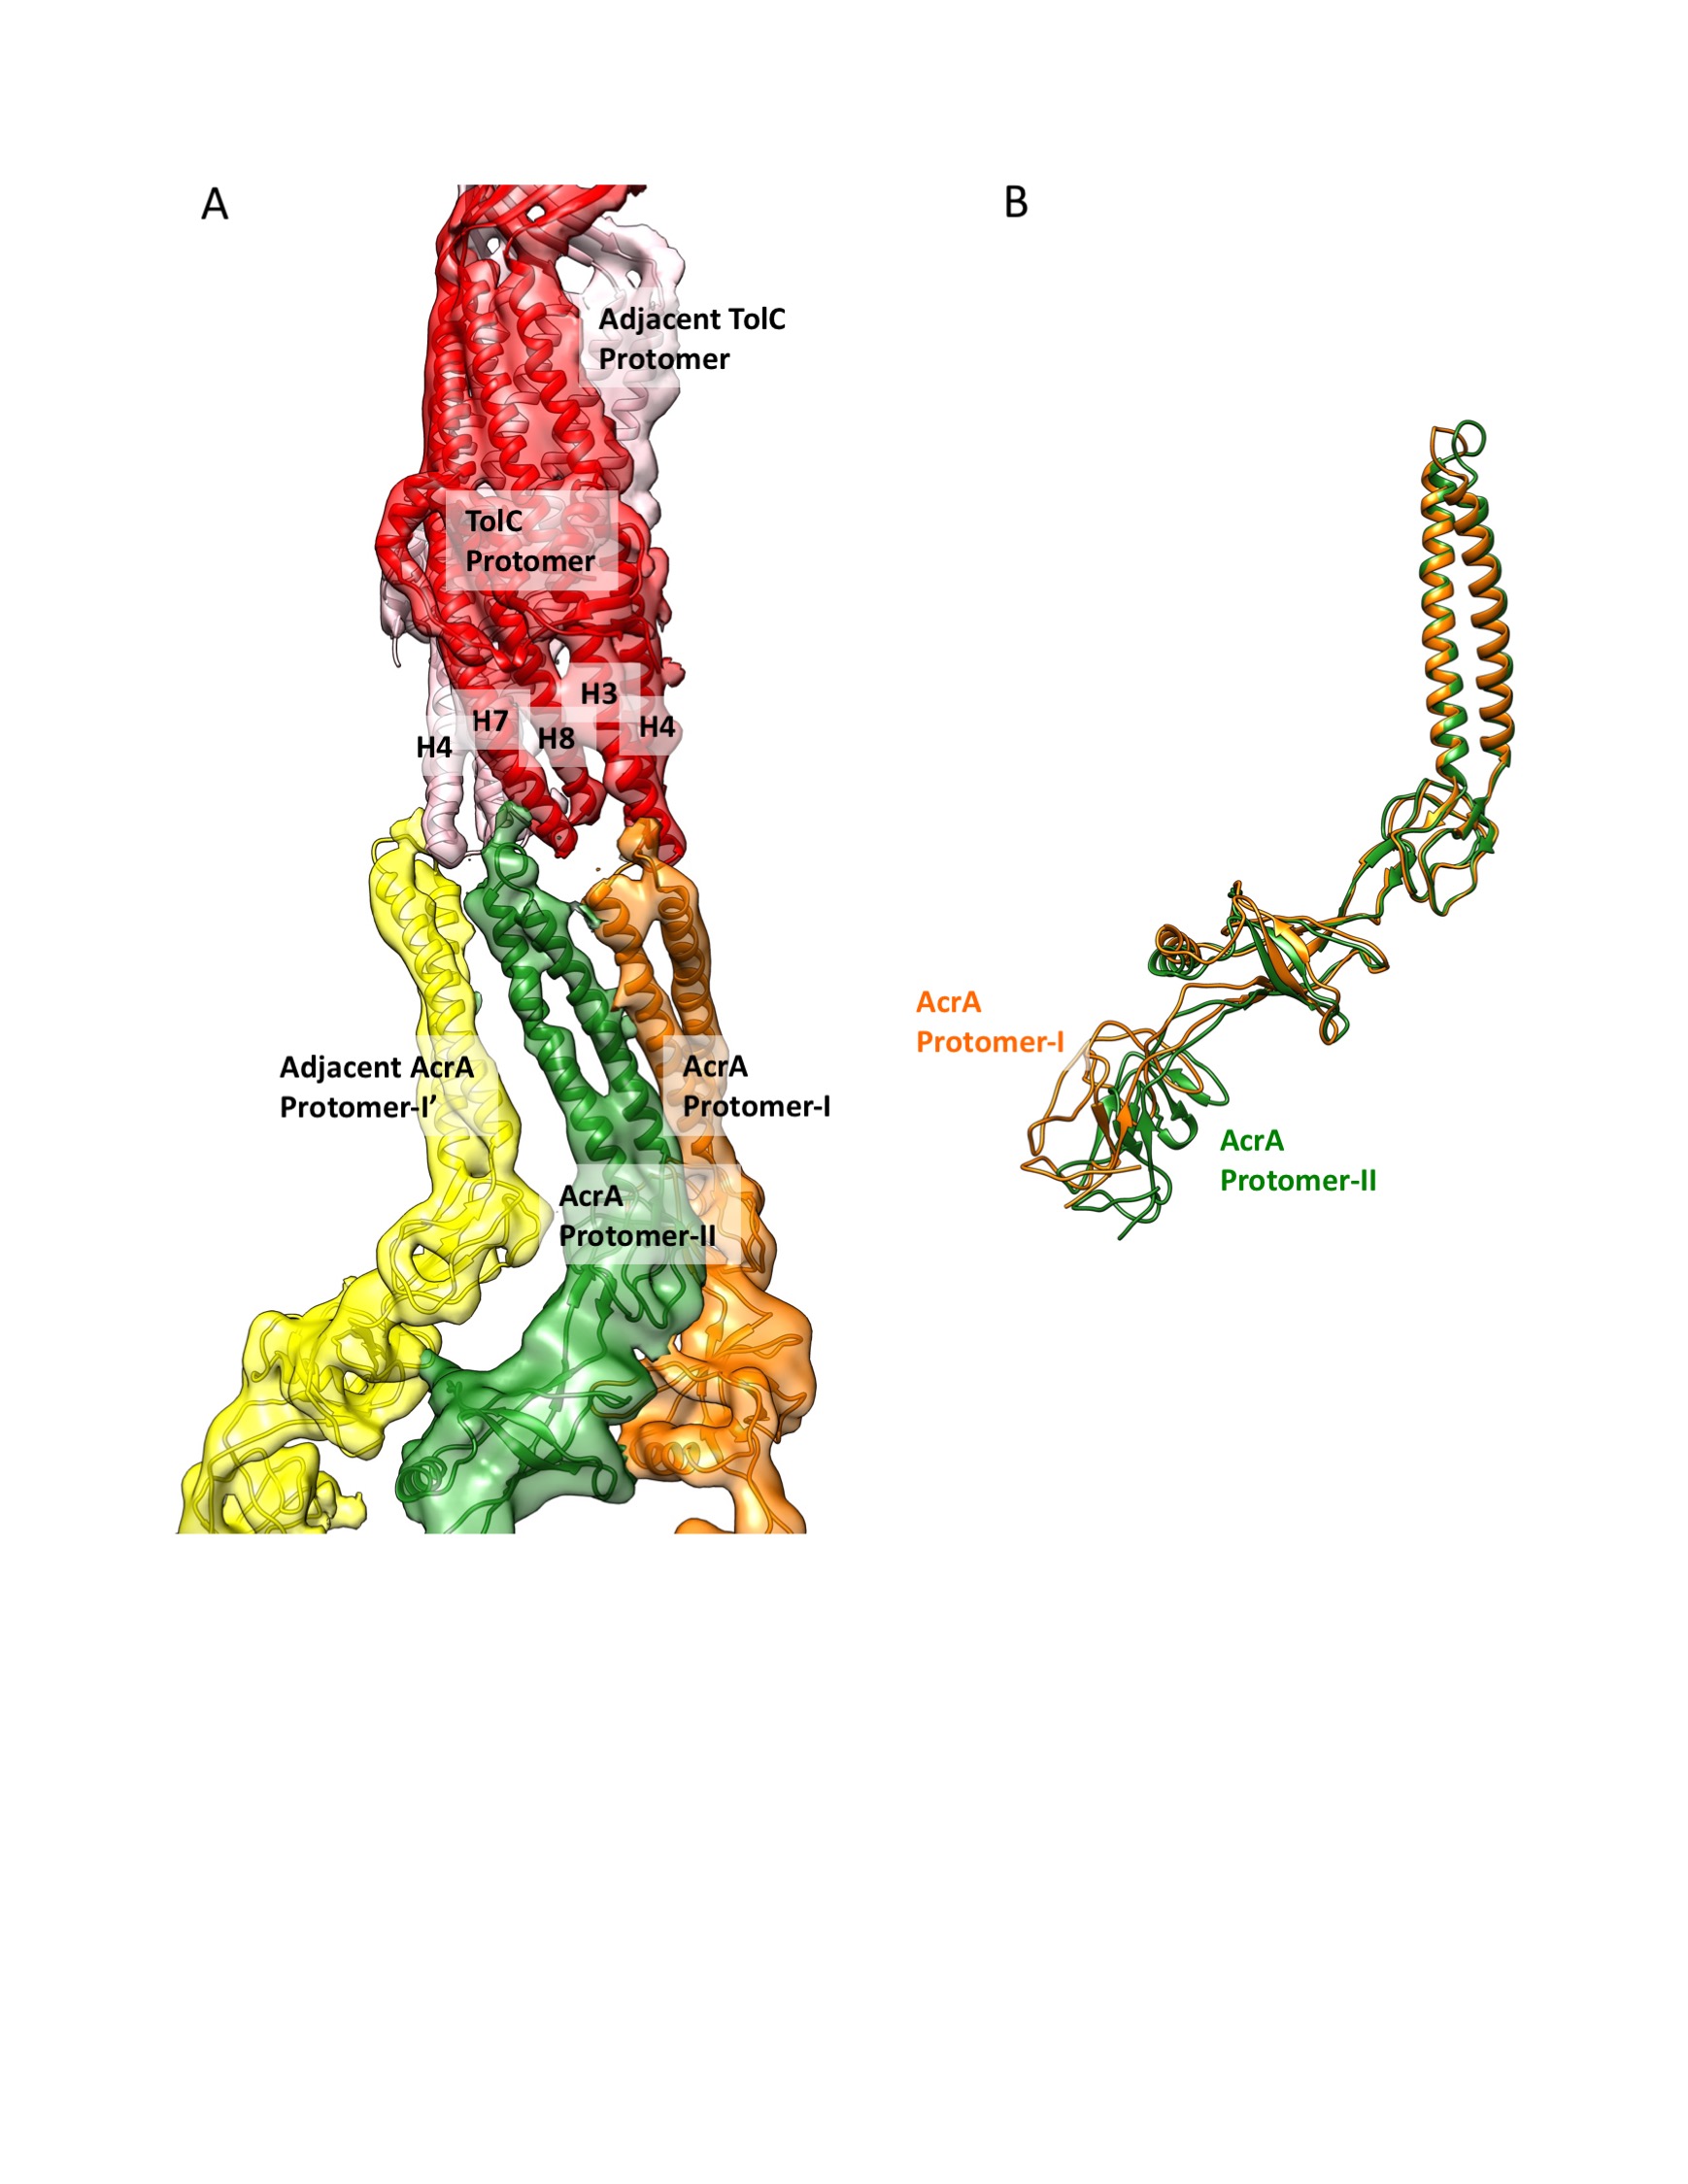


**Figure 1– supplement 5. Conformational difference between two AcrA protomers and their interaction with closed-state TolC in the apo-state. A.** Segments of the cryoEM density map of the pump with fitted models showing the interactions between AcrA and closed-state TolC. The AcrA helical hairpin, lipoyl and β-barrel domains between AcrA protomer-II (green) and the adjacent AcrA protomer-I’ (yellow) do not pack tightly to seal the channel from the periplasm, whereas they do form a tight seal in the ligand bound forms (see Figure 2 and Figure 3). **B.** Conformational difference between protomer-I (Orange) and protomer-II (Green) of AcrA in the cryoEM structure of apo AcrAB-TolC pump.
