# Supplementary material for: An allosteric transport mechanism for the AcrAB-TolC multidrug efflux pump
Source: eLife journal article supplement (doi:10.7554/elife.24905), 2017-03-29
Supplement: supp [file elife_poa_e24905_Figure_2_Supplement_2.docx]

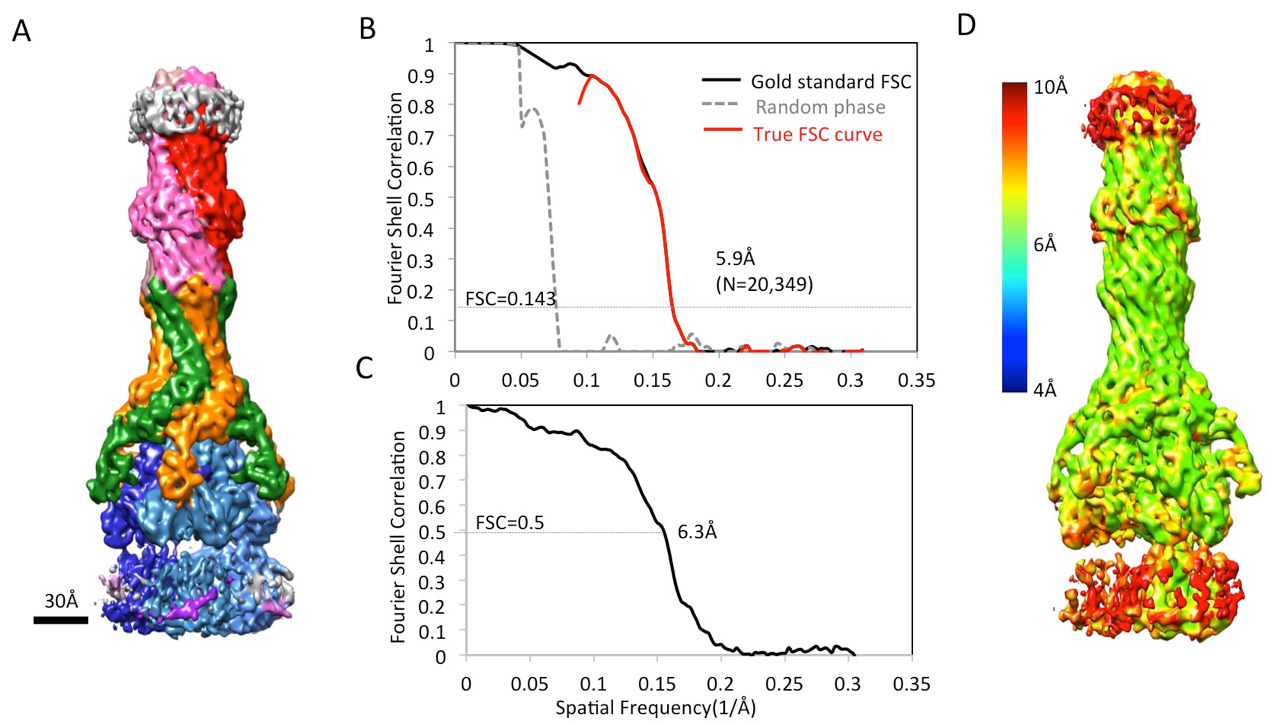


**Figure 2 – supplement 2. CryoEM analysis of asymmetric AcrABZ-TolC pump in presence of puromycin reconstructed from a subset of particle images after focus classification.** (A) Density map of asymmetric AcrABZ-TolC pump in the presence of puromycin, subunits are color-coded accordingly: TolC (Red and Pink), AcrA (Orange and Green), AcrB (Blue) and AcrZ (Purple). (B) True FSC curves of the asymmetric AcrABZ-TolC pump in the presence of puromycin. (C) FSC between cryoEM density map and model. (D) Colored coded ResMap map of the asymmetric AcrABZ-TolC pump in the presence of puromycin.
