# Supplementary material for: An allosteric transport mechanism for the AcrAB-TolC multidrug efflux pump
Source: eLife journal article supplement (doi:10.7554/elife.24905), 2017-03-29
Supplement: supp [file elife_poa_e24905_Figure_3_Supplement_2.docx]

**
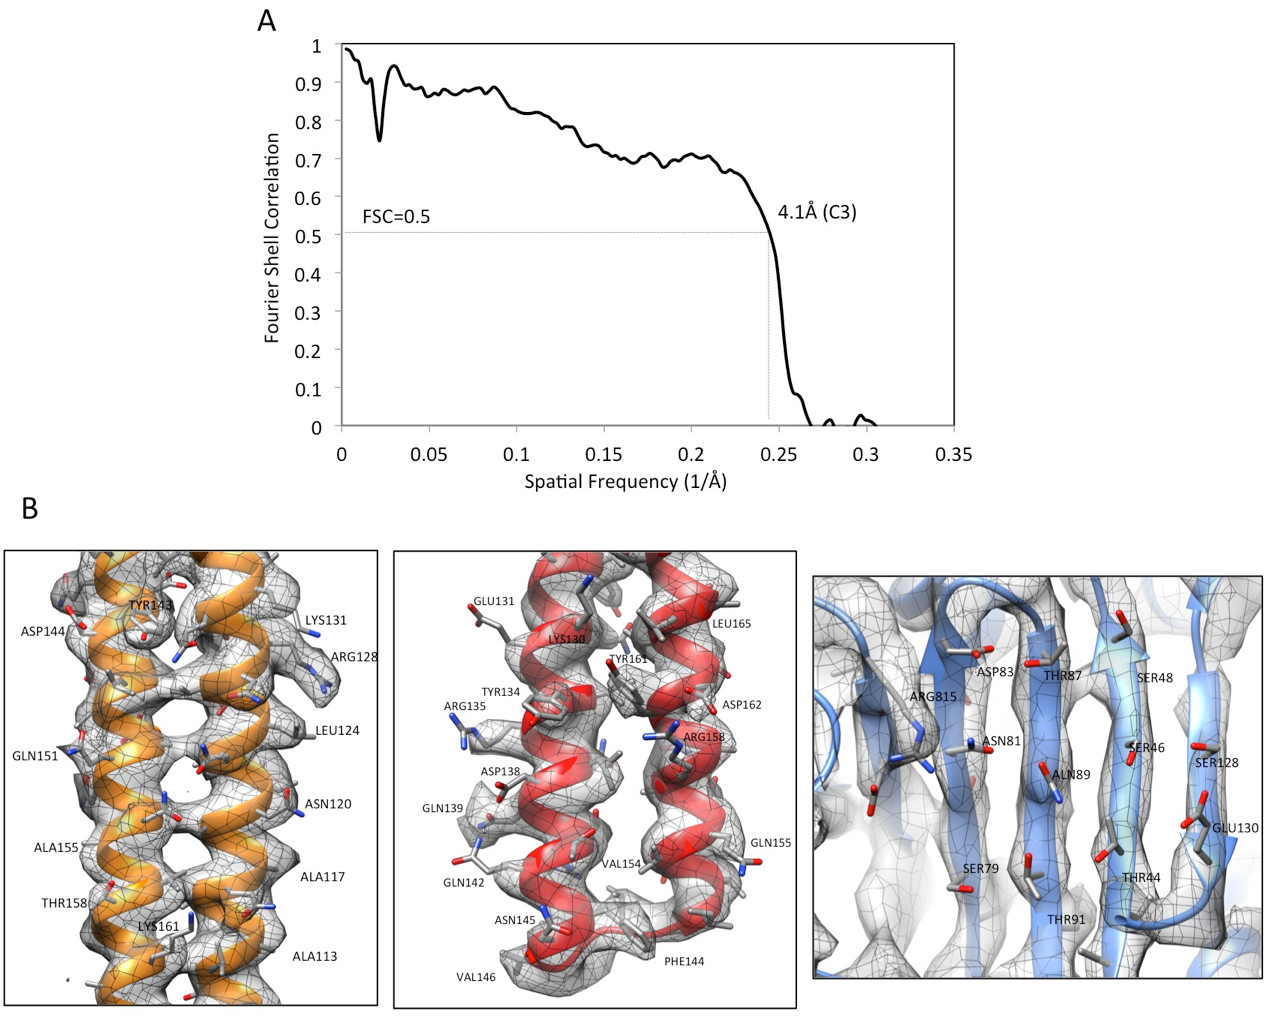
**

**Figure 3 supplement 2. Validation of AcrABZ-TolC/MBX3132** **density map and** **model.** (A)The FSC curve between the cryoEM density map (C3) and map calculated from the molecular model of AcrABZ-TolC/MBX3132. FSC cut-off = 0.5. (B) The densities of selected regions overlaid with the corresponding model: an α-helical hairpin domain of AcrA (Left), a coiled-coil in the α-helical barrel region of TolC (Middle) and a β-sheet in the pore domain of AcrB (Right).
