# Supplementary material for: An allosteric transport mechanism for the AcrAB-TolC multidrug efflux pump
Source: eLife journal article supplement (doi:10.7554/elife.24905), 2017-03-29
Supplement: supp [file elife_poa_e24905_Figure_4_Supplement_2.docx]

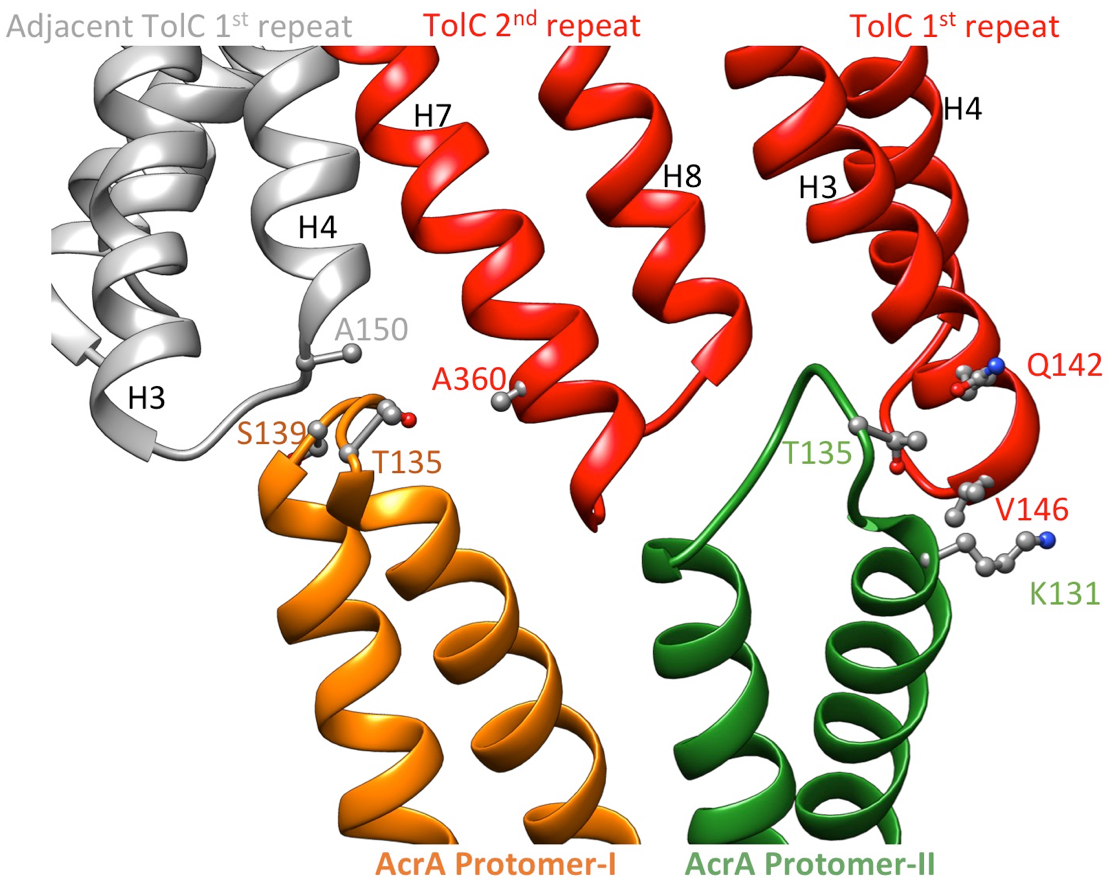


**Figure 4 – supplement 2. Pairs of co-evolved residues at the TolC-AcrA interface.** Four co-evolving residue pairs of the MdtNOP efflux pump between the components MdtN and MdtP were mapped onto crystal structures of VceC and MacA, (<http://datadryad.org/resource/doi:10.5061/dryad.s00vr/3>) (Ovchinnikov et al., 2014). The corresponding co-varying pairs in AcrA and TolC were obtained by sequence alignment between AcrA and MacA (Yum et al., 2009), and between TolC and VceC (Federici et al., 2005), respectively.
