# Supplementary material for: An allosteric transport mechanism for the AcrAB-TolC multidrug efflux pump
Source: eLife journal article supplement (doi:10.7554/elife.24905), 2017-03-29
Supplement: supp [file elife_poa_e24905_Figure_4_Supplement_3.docx]

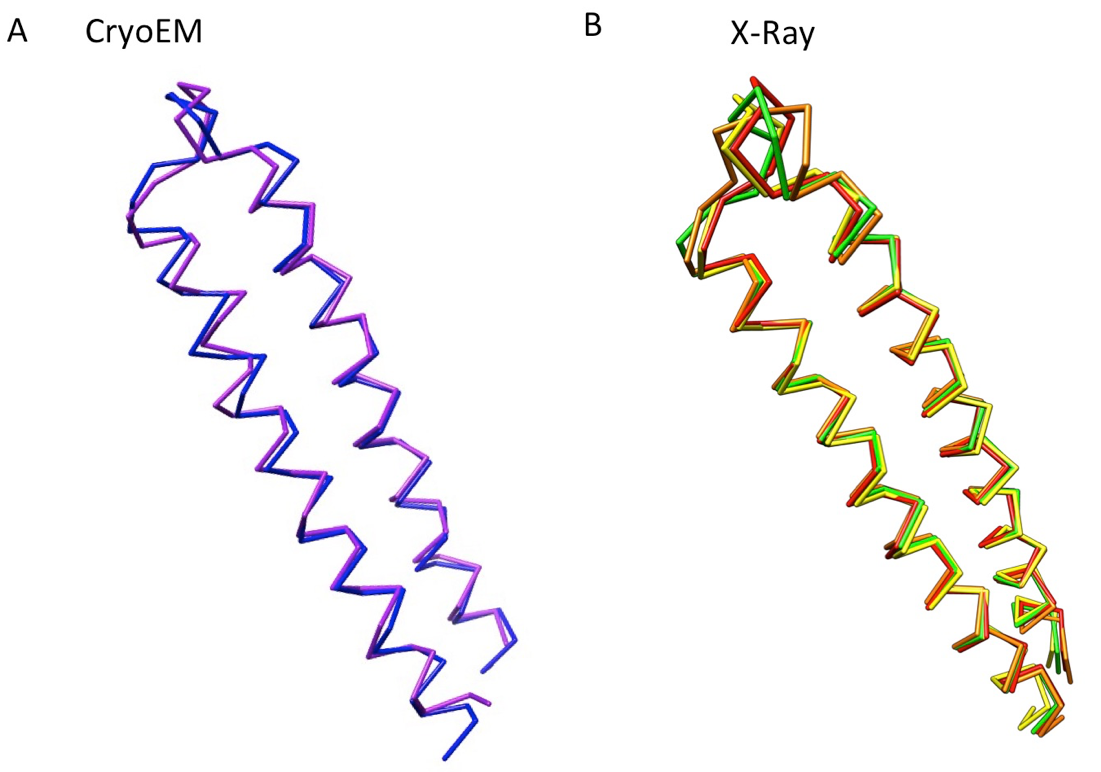


**Figure 4 – supplement 3. The conformational flexibility at the tips of α-helical hairpin domains of AcrA, displayed as Cα traces.** (A) Conformational difference of the α-helical hairpin domains of protomer-I (Blue) and protomer-II (Purple) of AcrA in the cryoEM structure of AcrABZ-TolC/MBX3132. (B) Four conformations of the α-helical hairpin domains of AcrA observed in a crystal structure. Chains A to D are coloured in Red, Orange, Yellow and Green, respectively (PDB code: 2F1M).
